# Supplementary material for: Measurement properties of the Knee Injury and Osteoarthritis Outcome Score Patello-Femoral questionnaire in Saudi Arabians
Source: PeerJ. 2020 Jul 31;8:e9323. doi: 10.7717/peerj.9323 (PMC7397982; doi:10.7717/peerj.9323)
Supplement: Supplemental Information 1 [file peerj-08-9323-s001.xlsx]

## Sheet: Pre
ID	PF01	PF02	PF03	PF04	PF05	PF06	PF07	PF08	PF09	PF10	PF11	KOOS-PF score			VAS-Pre
1	2	2	3	3	2	2	3	2	3	2	4	36.3636			9
2	3	3	2	2	4	4	2	3	4	4	3	22.7273			8
3	3	1	2	2	2	2	3	2	3	2	3	43.1818			8
4	2	2	3	2	3	2	2	2	3	2	3	40.9091			9
5	3	2	2	2	4	2	3	2	4	3	4	29.5455			8
6	2	3	3	2	2	4	3	2	3	2	3	34.0909			8
7	1	2	2	2	3	2	2	2	2	2	2	50			8
8	2	2	2	3	2	1	2	2	2	2	3	47.7273			7
9	3	3	2	2	3	2	3	3	4	2	4	29.5455			8
10	2	1	2	2	2	1	2	2	2	2	2	54.5455			7
11	3	1	2	2	2	3	2	4	3	2	3	38.6364			7
12	1	2	4	3	4	2	3	4	2	3	3	29.5455			7
13	1	3	2	2	2	0	2	2	1	2	2	56.8182			8
14	3	2	2	3	4	2	1	2	1	0	3	47.7273			7
15	2	3	2	2	2	4	3	2	4	3	2	34.0909			7
16	2	1	2	4	4	0	3	2	4	3	4	34.0909			7
17	3	3	3	2	2	4	2	2	3	3	3	31.8182			8
18	2	1	2	2	3	2	2	2	2	2	2	50			6
19	1	3	2	3	2	1	3	2	1	2	3	47.7273			7
20	2	2	2	2	3	2	3	3	4	2	4	34.0909			6
21	1	2	2	3	2	1	2	2	2	2	2	52.2727			6
22	2	1	2	2	2	3	2	4	2	1	1	50			7
23	2	2	4	2	2	2	3	4	2	3	3	34.0909			6
24	1	3	2	3	2	1	2	2	1	3	1	52.2727			6
25	2	1	2	2	2	1	2	1	2	1	2	59.0909			6
26	3	1	3	2	2	2	2	4	3	2	3	38.6364			7
27	2	2	2	3	2	2	3	2	2	3	1	45.4545			6
28	1	3	2	2	2	1	3	2	1	3	2	50			5
29	3	2	2	3	4	2	1	3	2	1	2	43.1818			7
30	2	3	2	2	2	2	2	2	3	2	4	40.9091			5
31	3	2	3	4	4	4	3	2	4	3	3	20.4545			6
32	2	3	2	2	2	2	3	2	3	3	4	36.3636			5
33	2	2	3	2	3	2	2	2	2	2	2	45.4545			5
34	1	1	2	2	2	2	2	2	2	2	2	54.5455			5
35	3	3	2	3	3	2	2	2	2	2	3	38.6364			5
36	3	2	3	2	2	2	3	3	3	2	3	36.3636			5
37	2	2	2	3	2	2	2	2	2	2	2	47.7273			5
38	3	1	2	2	2	2	2	4	3	2	3	40.9091			4
39	2	2	4	2	2	2	3	3	2	3	3	36.3636			4
40	1	3	2	3	2	1	3	2	1	2	1	52.2727			5
41	3	2	2	2	4	2	1	3	2	1	3	43.1818			4
42	2	3	3	4	2	3	3	1	3	3	4	29.5455			5
43	3	2	2	2	4	4	2	2	4	3	3	29.5455			4
44	2	3	3	4	2	4	3	2	4	2	4	25			8
45	2	1	2	2	3	1	2	0	2	2	2	56.8182			9
46	2	3	2	2	2	2	3	2	2	2	3	43.1818			9
47	2	2	2	2	3	1	3	3	3	2	3	40.9091			9
48	2	3	3	4	2	4	3	2	4	2	4	25			5
49	3	3	3	4	4	4	3	2	4	3	4	15.9091			7
50	4	3	4	3	4	4	4	4	4	4	4	4.54545			6
51	3	2	3	2	3	2	3	2	3	2	3	36.3636			6
52	3	2	3	2	3	2	3	2	3	2	3	36.3636			7
53	3	3	3	4	4	4	3	2	4	3	4	15.9091			6
54	3	3	3	4	4	4	3	2	4	3	4	15.9091			6
55	2	2	3	2	3	2	2	2	2	2	2	45.4545			6
56	3	3	2	3	3	2	3	2	2	2	3	36.3636			7
57	4	3	3	4	3	2	3	4	4	2	4	18.1818			6
58	3	2	2	3	2	2	2	2	2	2	2	45.4545			5
59	3	1	3	2	2	3	2	4	3	2	3	36.3636			7
60	2	3	4	3	4	2	3	4	2	3	3	25			5
61	2	3	4	3	2	1	3	2	1	3	2	40.9091			6
62	3	4	2	3	4	2	1	3	2	1	3	36.3636			5
63	3	3	3	4	4	4	3	2	4	3	4	15.9091			5
64	3	3	3	4	4	4	3	2	4	3	4	15.9091			5
65	3	3	3	4	4	4	3	2	4	3	4	15.9091			5
66	2	2	3	2	3	2	2	2	2	2	2	45.4545			5
67	3	3	2	3	3	2	3	2	2	2	3	36.3636			5
68	4	3	3	4	3	2	3	4	4	2	4	18.1818			4
69	3	2	2	3	2	2	2	2	2	2	2	45.4545			4
70	3	1	3	2	2	3	2	4	3	2	3	36.3636			7
71	2	3	4	3	4	2	3	4	2	3	3	25			5
72	2	3	4	3	2	1	3	2	1	3	2	40.9091			6
73	3	2	2	3	2	2	2	2	2	2	2	45.4545			5
74	3	1	3	2	2	3	2	4	3	2	3	36.3636			5
75	2	3	4	3	4	2	3	4	2	3	3	25			5
76	2	3	4	3	2	1	3	2	1	3	2	40.9091			5
77	3	4	2	3	4	2	1	3	2	1	3	36.3636			5
78	3	3	3	4	4	4	3	2	4	3	4	15.9091			5
79	3	3	3	4	4	4	3	2	4	3	4	15.9091			4
80	3	3	3	4	4	4	3	2	4	3	4	15.9091			4
81	2	2	3	2	3	2	2	2	2	2	2	45.4545			5
82	2	2	3	2	3	2	2	2	2	2	2	45.4545			4
83	3	3	2	3	3	2	3	2	2	2	3	36.3636			5
84	4	3	3	4	3	2	3	4	4	2	4	18.1818			4
85	3	2	2	3	2	2	2	2	2	2	2	45.4545			8
86	3	1	3	2	2	3	2	4	3	2	3	36.3636			9
87	2	3	4	3	4	2	3	4	2	3	3	25			9
88	2	3	4	3	2	1	3	2	1	3	2	40.9091			9
89	3	4	2	3	4	2	1	3	2	1	3	36.3636			5
90	3	3	3	4	4	4	3	2	4	3	4	15.9091			7
91	3	3	3	4	4	4	3	2	4	3	4	15.9091			6
92	3	3	3	4	4	4	3	2	4	3	4	15.9091			6
93	2	2	3	2	3	2	2	2	2	2	2	45.4545			7
94	3	3	2	3	3	2	3	2	2	2	3	36.3636			6
95	4	3	3	4	3	2	3	4	4	2	4	18.1818			6

## Sheet: Post
PF01	PF02	PF03	PF04	PF05	PF06	PF07	PF08	PF09	PF10	PF11	KOOS-PF score		ID			VAS-Post
1	2	3	3	2	2	1	2	3	2	4	43.1818		1			8
3	3	2	2	4	4	2	3	4	4	3	22.7273		2			7
													3
2	2	3	2	3	2	2	2	3	2	3	40.9091		4			8
1	2	2	2	3	2	3	2	3	3	3	40.9091		5			8
2	3	3	2	2	3	3	2	2	2	3	38.6364		6			7
1	2	2	2	3	2	2	2	2	2	2	50		7			7
2	2	2	3	2	1	2	2	2	2	3	47.7273		8			8
2	3	2	2	3	2	3	3	2	2	3	38.6364		9			7
													10
2	1	2	2	2	3	2	3	3	2	3	43.1818		11			8
													12
1	3	2	2	2	0	2	2	1	2	2	56.8182		13			7
3	2	2	3	3	2	0	2	1	0	3	52.2727		14			7
2	3	2	2	2	3	3	2	3	3	2	38.6364		15			8
													16
													17
2	1	2	2	3	2	2	2	2	2	2	50		18			5
1	3	2	3	2	1	2	2	1	1	3	52.2727		19			7
2	2	2	2	3	2	3	3	3	2	3	38.6364		20			6
1	2	2	3	2	1	2	2	2	2	2	52.2727		21			7
2	1	2	2	2	2	2	3	2	1	1	54.5455		22			6
2	2	3	2	2	2	3	3	2	3	2	40.9091		23			6
1	3	2	2	2	1	1	2	1	3	1	56.8182		24			6
2	1	2	2	2	1	2	1	2	1	2	59.0909		25			7
3	1	3	2	2	2	2	3	3	1	3	43.1818		26			6
2	2	2	1	2	2	3	1	2	3	1	52.2727		27			6
													28
3	2	2	3	3	2	1	3	1	1	2	47.7273		29			6
2	3	2	2	2	2	2	2	3	2	4	40.9091		30			5
3	2	3	3	3	3	3	2	3	3	3	29.5455		31			5
2	3	2	2	2	2	3	2	3	3	4	36.3636		32			5
2	2	3	2	3	2	2	2	2	2	2	45.4545		33			6
1	1	2	2	2	2	2	2	2	2	2	54.5455		34			4
3	3	2	3	3	2	2	2	2	2	3	38.6364		35			5
3	2	3	2	2	2	3	3	3	2	3	36.3636		36			4
2	2	2	3	2	2	2	2	2	2	2	47.7273		37			5
3	1	2	2	2	2	2	3	3	2	3	43.1818		38			5
2	2	3	2	2	2	3	3	2	3	3	38.6364		39			5
1	3	2	3	2	1	3	2	1	2	1	52.2727		40			5
3	2	2	2	3	2	1	3	2	1	3	45.4545		41			6
2	3	3	3	3	3	3	1	3	3	3	31.8182		42			4
1	2	2	1	3	3	2	2	3	3	3	43.1818		43			4
2	3	3	3	2	3	3	2	3	2	3	34.0909		44			8
1	1	2	2	1	1	2	0	1	2	2	65.9091		45			9
2	3	2	2	2	2	3	2	2	2	3	43.1818		46			9
1	1	2	2	3	1	3	3	3	2	3	45.4545		47			9
2	3	3	3	3	3	3	1	3	3	3	31.8182		48			6
3	3	3	3	4	4	3	2	3	3	4	20.4545		49			5
3	3	4	3	3	4	4	4	3	4	4	11.3636		50			7
													51
3	2	2	2	3	2	3	2	2	2	2	43.1818		52			6
2	3	3	3	4	4	3	2	3	3	4	22.7273		53			7
3	3	3	4	4	4	3	2	4	3	4	15.9091		54			6
1	2	3	2	3	1	2	2	1	2	2	52.2727		55			6
3	3	2	3	3	2	3	2	2	2	3	36.3636		56			6
4	3	3	4	3	2	3	4	4	2	4	18.1818		57			7
3	2	2	3	2	2	2	2	2	2	2	45.4545		58			6
3	1	3	2	2	3	2	4	3	2	3	36.3636		59			5
													60
													61
3	4	2	3	4	2	1	3	2	1	3	36.3636		62			6
3	3	3	4	4	4	3	2	4	3	4	15.9091		63			5
3	3	3	4	4	4	3	2	4	3	4	15.9091		64			5
3	3	3	4	4	4	3	2	4	3	4	15.9091		65			5
2	2	3	2	3	2	2	2	2	2	2	45.4545		66			5
3	3	2	3	3	2	3	2	2	2	3	36.3636		67			5
3	3	3	3	2	2	3	3	4	2	2	31.8182		68			5
3	2	2	3	2	2	2	2	2	2	2	45.4545		69			4
3	1	3	2	2	3	2	4	3	2	3	36.3636		70			4
1	3	3	3	4	2	3	3	2	3	3	31.8182		71			7
1	3	4	3	2	1	3	2	1	3	2	43.1818		72			5
3	2	2	3	2	2	2	2	2	2	2	45.4545		73			6
3	1	3	2	2	3	2	4	3	2	3	36.3636		74			5
2	3	4	3	4	2	3	4	2	3	3	25		75			5
2	3	4	3	2	1	3	2	1	3	2	40.9091		76			5
3	4	2	3	4	2	1	3	2	1	3	36.3636		77			5
3	3	3	4	4	4	3	2	4	3	4	15.9091		78			5
3	3	3	4	4	4	3	2	4	3	4	15.9091		79			5
3	3	3	4	4	4	3	2	4	3	4	15.9091		80			4
2	2	3	2	3	2	2	2	2	2	2	45.4545		81			4
2	2	3	2	3	2	2	2	2	2	2	45.4545		82			5
3	3	2	3	3	2	3	2	2	2	3	36.3636		83			4
													84
3	2	2	3	2	2	2	2	2	2	2	45.4545		85			8
3	1	3	2	2	3	2	4	3	2	3	36.3636		86			9
2	3	3	3	3	2	3	3	2	2	3	34.0909		87			9
													88
2	4	2	3	4	2	1	3	2	1	3	38.6364		89			5
2	3	3	3	4	4	2	2	2	3	4	27.2727		90			7
3	3	3	4	4	4	3	2	4	3	4	15.9091		91			6
3	3	3	4	4	4	3	2	4	3	4	15.9091		92			6
2	2	3	2	3	2	2	2	2	2	2	45.4545		93			7
3	3	2	3	3	2	3	2	2	2	3	36.3636		94			6
3	3	3	4	3	1	3	4	3	2	4	25		95			6
